# Supplementary material
Source: ML conference proceedings conference paper supplement (https://proceedings.neurips.cc/paper_files/paper/2019/hash/6018df1842f7130f1b85a6f8e911b96b-Abstract.html)
Supplement: Supplementary file 1 [file 6018df1842f7130f1b85a6f8e911b96b-Supplemental.zip]

Archive with 1 entries (1 files):
- Learning_to_learn_by_self-critique_supplementary.pdf
